# Supplementary material for: PV1 Protein from Plasmodium falciparum Exhibits Chaperone-Like Functions and Cooperates with Hsp100s
Source: PubMed Central journal article supplement (PMC7697860; doi:10.3390/ijms21228616), 2020-11-16
Supplement: ijms-21-08616-s001.pdf [file ijms-21-08616-s001.pdf]

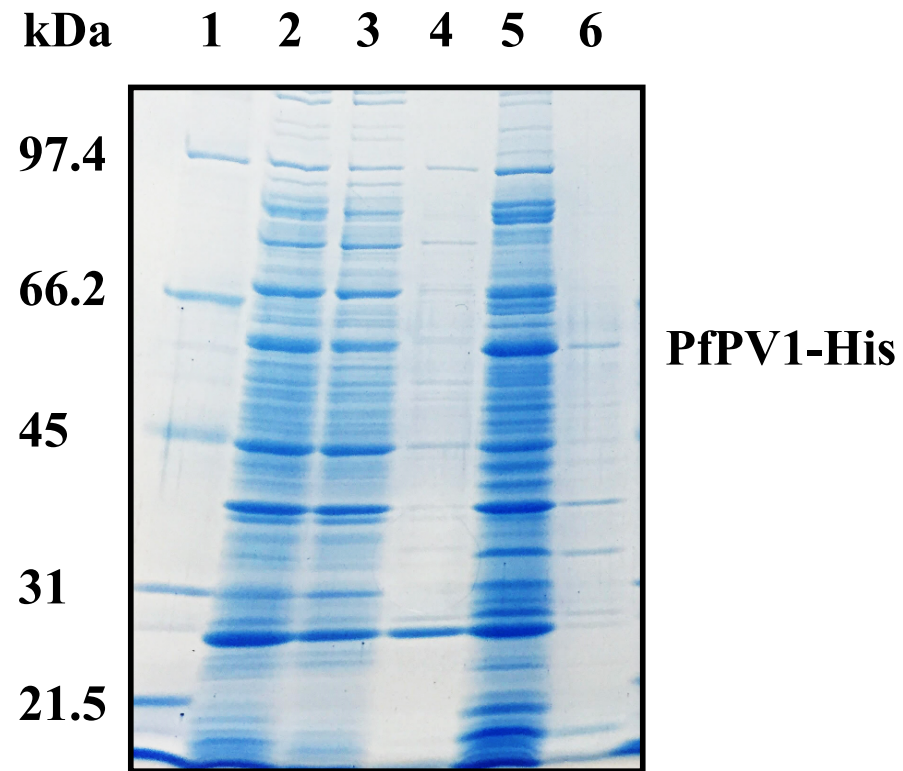

**Supplementary Fig. S1 Expression and purification of PfPV1-His**

**1, Molecular marker; 2, Crude extract; 3, Flow-through;  
4, Wash; 5, Elution 1; 6, Elution 2.**

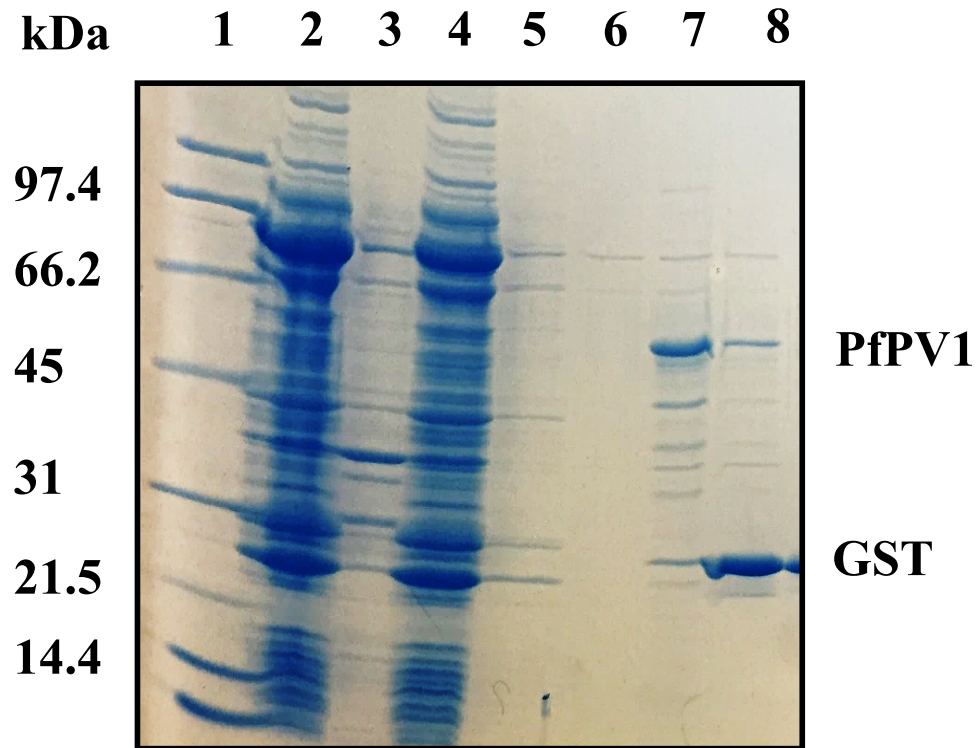

**Supplementary Fig. S2 Expression and purification of GST-PfPV1**

**1, Molecular marker; 2, Crude extract; 3, Precipitant;  
4, Flow-through of affinity column; 5, Wash 1 ; 6, Wash 2;  
6, Elution by HRV3C protease digestion; 7, Elution by glutathione.**

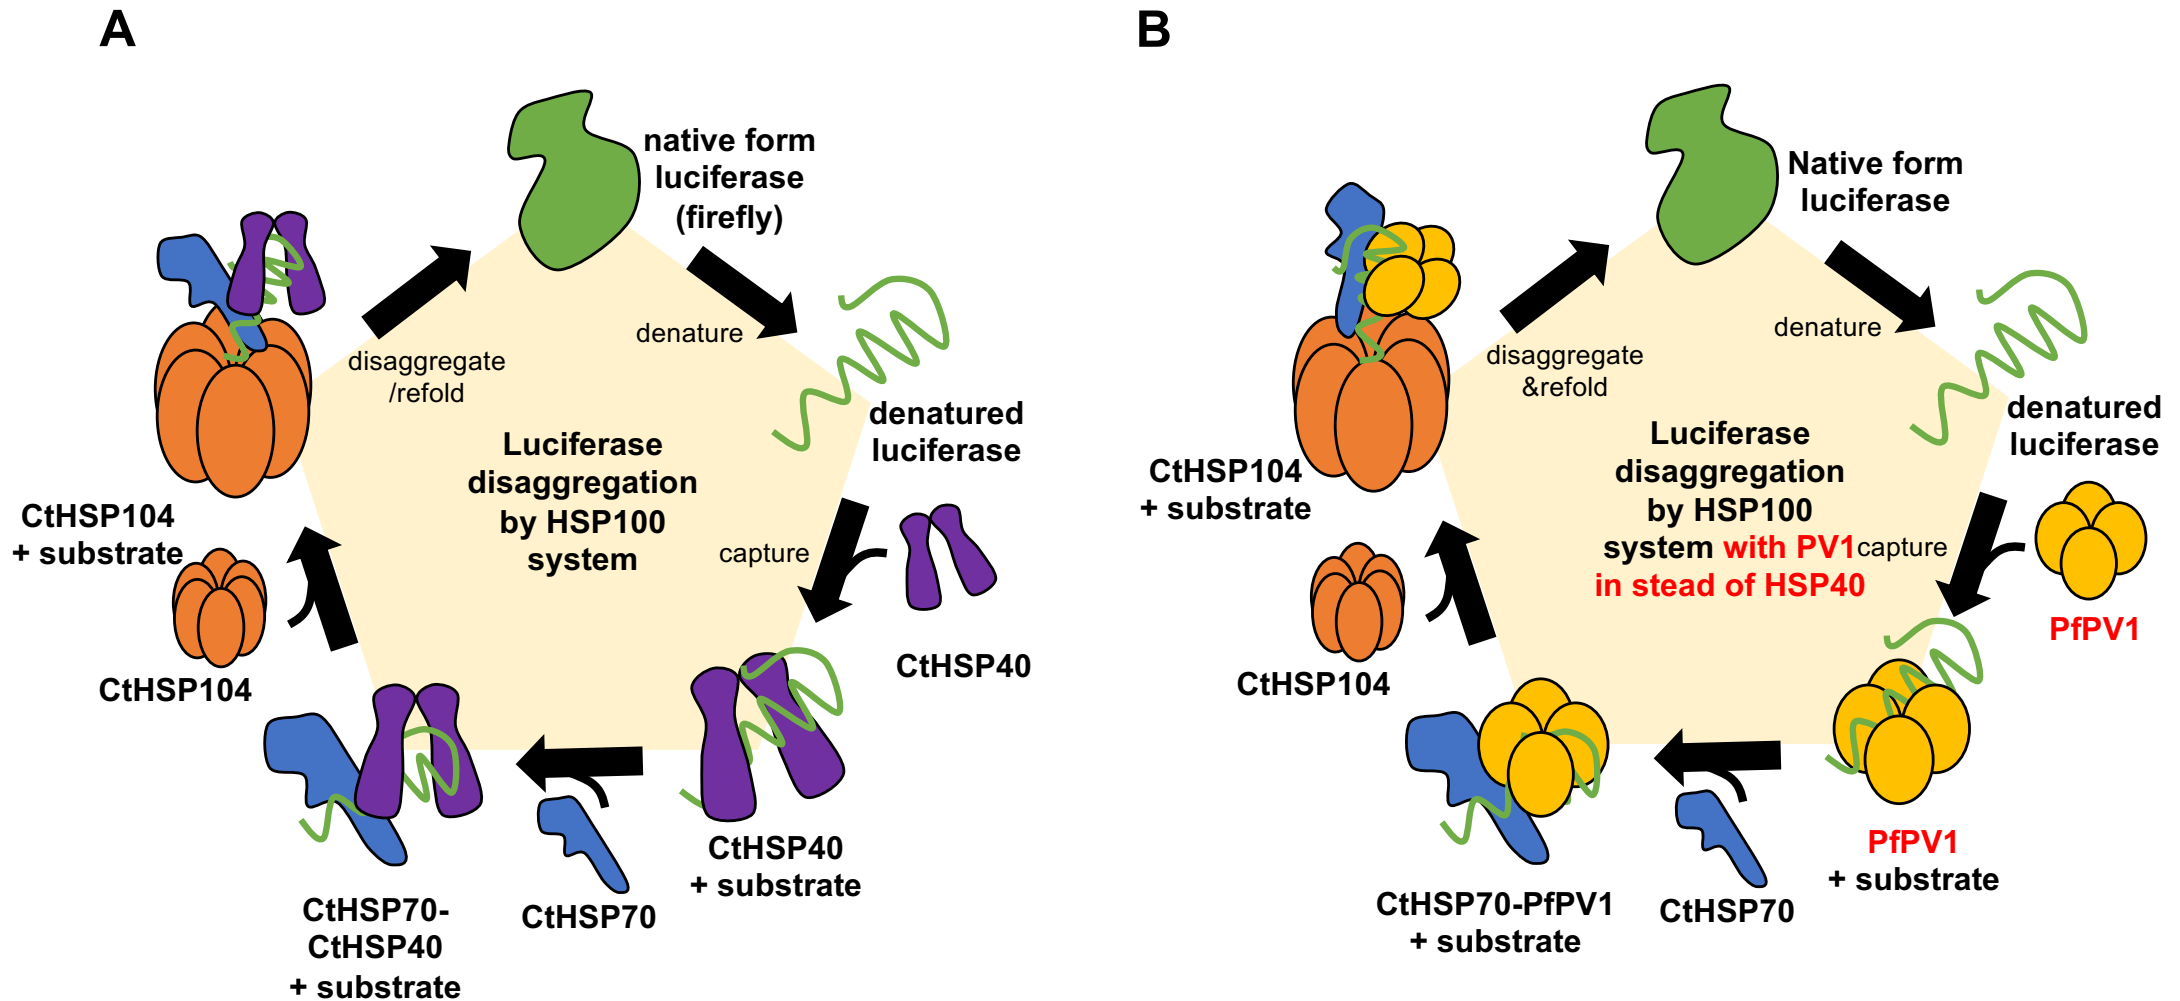

Supplementary Fig. S3

Schematic models for protein disaggregation by CtHsp104 system (A) and that with the replacement of CtHsp40 by PfPV1 (B)

Supplementary Table S1. Primer sequences

| Product       | AA range | Fw/Rv | Sequence                                                   |
|---------------|----------|-------|------------------------------------------------------------|
| PV1_HIS       | V23-S452 | Fw    | CATGccatgGTGGTGGCCCCTAAGAGTG                               |
|               |          | Rv    | CCGctcgagGCTCGATATTGGTGTGTTTTGATCATTTC                     |
| GST_PV1       | V23-S452 | Fw    | CGggatccGTGGTGGCCCCTAAGAGTG                                |
|               |          | Rv    | CCGctcgagCTAGCTCGATATTGGTGTG                               |
| GST_PV1_Strep | V23-S452 | Fw    | CGggatccGTGGTGGCCCCTAAGAGTG                                |
|               |          | Rv    | CCGCTCGAGCTATTTTTCAAACCTGCGGATGGGACCAGCTCGATATTGGTGTGTTTTG |
